# Supplementary material
Source: PubMed Central journal article supplement (PMC2774084)

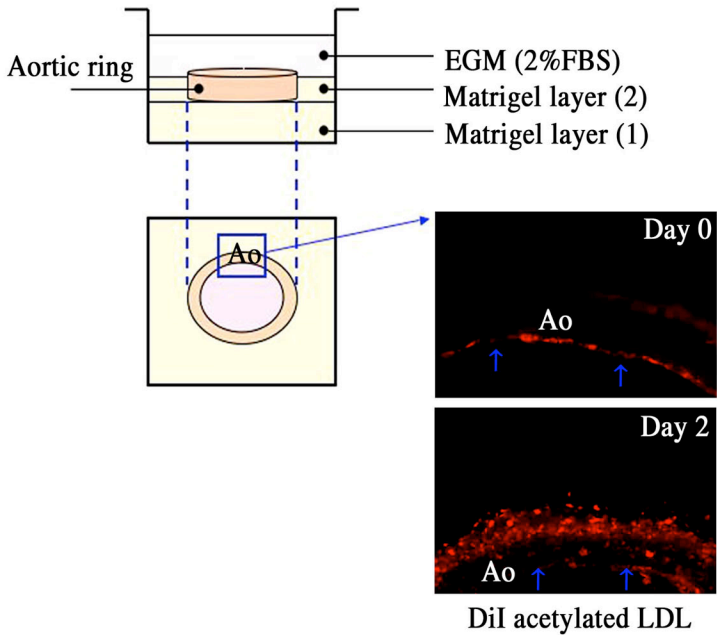

Supplement: ajpath.2009.090152_1.pdf [file ajpath.2009.090152_1.pdf]

**A**

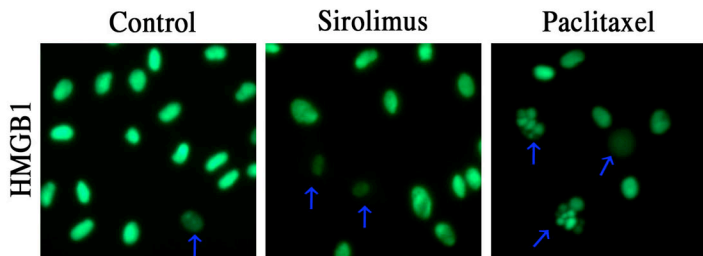

**B**

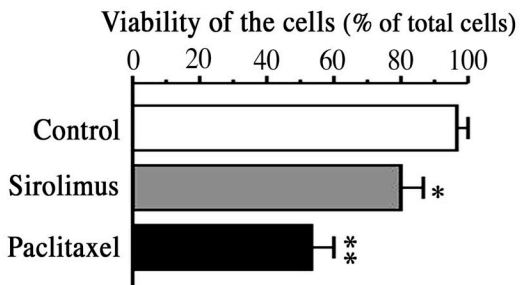

**C**

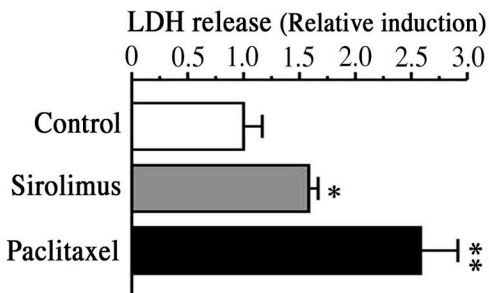

Supplement: ajpath.2009.090152_2.pdf [file ajpath.2009.090152_2.pdf]

**A**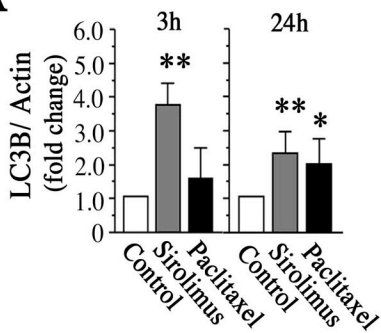**B**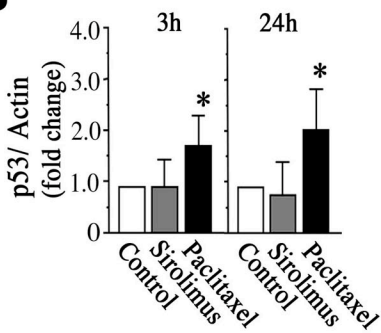**C**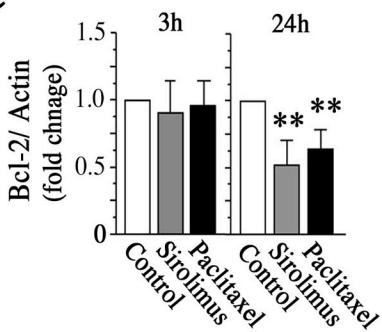**D**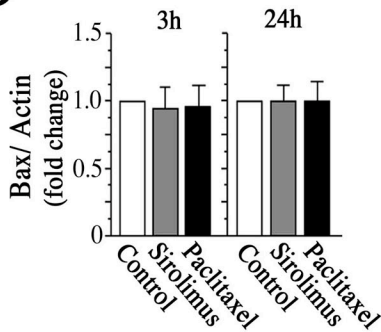**E**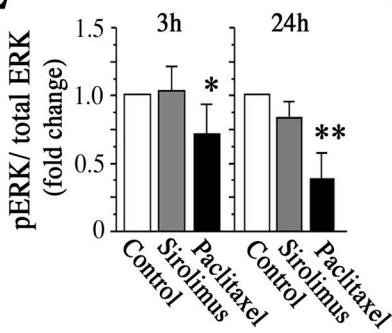**F**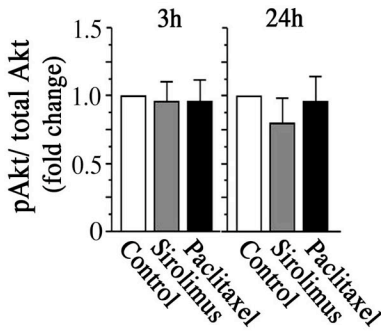

Supplement: ajpath.2009.090152_3.pdf [file ajpath.2009.090152_3.pdf]
